# Supplementary material for: Experimental Evidence for Diiodohydroxyquinoline-Induced Neurotoxicity: Characterization of Age and Gender as Predisposing Factors
Source: MDPI journal article supplement (doi:10.3390/ph15020251), 2022-02-19
Supplement: s1 [file s1]

**Supplementary Table S1** Histopathological lesion scoring for cortex, striatum, spinal cord, and sciatic nerve in diiodohydroxyquinoline-treated animals

| Organ           | Histopathological lesion             | CYM     | CYF     | CAM     | CAF     | TYM             | TYF              | TAM               | TAF               |
|-----------------|--------------------------------------|---------|---------|---------|---------|-----------------|------------------|-------------------|-------------------|
| Cerebral cortex | degeneration and necrosis of neurons | 0 (0-1) | 0 (0-1) | 0 (0-1) | 0 (0-1) | 4 (3-4)<br>abcd | 5 (4-5)<br>abcde | 3 (3-4)<br>abcdef | 4 (3-4)<br>abcdef |
|                 | Neuronophagia                        | 0 (0-0) | 0 (0-0) | 0 (0-0) | 0 (0-0) | 3 (3-4)<br>abcd | 4 (3-4)<br>abcd  | 3 (3-3)<br>abcdef | 3 (3-4)<br>abcd   |
|                 | Neurofibrillary tangles              | 0 (0-0) | 0 (0-0) | 0 (0-0) | 0 (0-0) | 3 (3-4)<br>abcd | 4 (4-5)<br>abcde | 3 (3-4)<br>abcdef | 4 (4-5)<br>abcdeg |
|                 | Cerebral congestion                  | 0 (0-0) | 0 (0-0) | 0 (0-0) | 0 (0-0) | 3 (3-4)<br>abcd | 4 (4-5)<br>abcde | 4 (3-4)<br>abcd   | 3 (3-4)<br>abcdef |
|                 | Meningeal congestion                 | 0 (0-0) | 0 (0-0) | 0 (0-0) | 0 (0-0) | 4 (4-5)<br>abcd | 5 (4-5)<br>abcd  | 4 (3-4)<br>abcdef | 4 (4-5)<br>abcd   |

|          |                               |         |         |         |         |                 |                  |                   |                    |
|----------|-------------------------------|---------|---------|---------|---------|-----------------|------------------|-------------------|--------------------|
|          | Focal gliosis                 | 0 (0-0) | 0 (0-0) | 0 (0-0) | 0 (0-0) | 4 (3-4)<br>abcd | 4 (4-5)<br>abcd  | 3 (2-3)<br>abcdef | 4 (3-4)<br>abcdg   |
|          | Demyelination of nerve fibers | 0 (0-0) | 0 (0-0) | 0 (0-0) | 0 (0-0) | 4 (3-4)<br>abcd | 5 (4-5)<br>abcd  | 3 (3-4)<br>abcd   | 4 (3-4)<br>abcd    |
| Striatum | Shrunken and pyknotic neurons | 0 (0-0) | 0 (0-0) | 0 (0-0) | 0 (0-0) | 3 (3-4)<br>abcd | 4 (4-5)<br>abcde | 4 (3-4)<br>abcd   | 4 (3-4)<br>abcd    |
|          | Demyelination                 | 0 (0-1) | 0 (0-1) | 0 (0-1) | 0 (0-1) | 3 (3-4)<br>abcd | 4 (4-5)<br>abcde | 3 (3-4)<br>abcdef | 3 (3-4)<br>abcdef  |
|          | Spongiosis                    | 0 (0-0) | 0 (0-0) | 0 (0-0) | 0 (0-0) | 3 (3-4)<br>abcd | 4 (4-5)<br>abcde | 3 (3-4)<br>abcdef | 2 (2-3)<br>abcdefg |
|          | Diffuse gliosis               | 0 (0-0) | 0 (0-0) | 0 (0-0) | 0 (0-0) | 3 (3-4)<br>abcd | 3 (3-4)<br>abcd  | 2 (2-3)<br>abcdef | 4 (3-4)<br>abcdg   |

|               |                                   |         |         |         |         |                 |                  |                   |                   |
|---------------|-----------------------------------|---------|---------|---------|---------|-----------------|------------------|-------------------|-------------------|
| Spinal cord   | Wallerian degeneration            | 0 (0-0) | 0 (0-0) | 0 (0-0) | 0 (0-0) | 4 (3-4)<br>abcd | 5 (4-5)<br>abcde | 4 (3-4)<br>abcdef | 4 (3-4)<br>abcdef |
|               | Necrosis of neurons               | 0 (0-1) | 0 (0-1) | 0 (0-1) | 0 (0-1) | 4 (3-4)<br>abcd | 4 (3-4)<br>abcd  | 3 (3-4)<br>abcd   | 4 (3-4)<br>abcd   |
|               | Demyelination in the white matter | 0 (0-1) | 0 (0-1) | 0 (0-1) | 0 (0-1) | 3 (3-4)<br>abcd | 4 (3-4)<br>abcd  | 3 (3-3)<br>abcd   | 3 (3-4)<br>abcd   |
|               | Microgliosis in the grey matter   | 0 (0-0) | 0 (0-0) | 0 (0-0) | 0 (0-0) | 3 (2-3)<br>abcd | 3 (3-4)<br>abcd  | 3 (2-3)<br>abcd   | 3 (2-3)<br>abcd   |
| Sciatic nerve | Demyelination of nerve fibers     | 0 (0-1) | 0 (0-1) | 0 (0-1) | 0 (0-1) | 3 (3-4)<br>abcd | 4 (3-4)<br>abcd  | 3 (3-4)<br>abcd   | 4 (3-4)<br>abcd   |

|  |                                               |         |         |         |         |                 |                  |                   |                   |
|--|-----------------------------------------------|---------|---------|---------|---------|-----------------|------------------|-------------------|-------------------|
|  | Degeneration<br>of myelinated<br>nerve fibers | 0 (0-0) | 0 (0-0) | 0 (0-0) | 0 (0-0) | 3 (3-4)<br>abcd | 4 (4-5)<br>abcde | 3 (3-4)<br>abcdef | 3 (3-4)<br>abcdef |
|--|-----------------------------------------------|---------|---------|---------|---------|-----------------|------------------|-------------------|-------------------|

The scoring system was configured to: score 0 = absence of the lesion in all rats of the group, score 1 = 1–10%, score 2 = 11–25%, score 3 = 26–50%, score 4 = 51–75%, score 5 = over 75%. Data are expressed as median (min-max). a vs control young male, b vs control young female, c vs control adult male, d vs control adult female, e vs treated young male, f vs treated young female, g vs treated adult male using three-way ANOVA followed by Tukey's post hoc test;  $p < 0.05$ . CYM; control young male, CYF; control young female, CAM; control adult male, CAF; control adult female, TYM; treated young male, TYF; treated young female, TAM; treated adult male, TAF; treated adult female.
